# Supplementary material
Source: PubMed Central journal article supplement (PMC3265675)
Supplement: NIHMS342148-supplement.pdf [file NIHMS342148-supplement.pdf]

# **SUPPLEMENTAL MATERIAL**

## **CHARACTERIZING AND IDENTIFYING RISK FOR FALLS IN THE LEAPS STUDY: A RANDOMIZED CLINICAL TRIAL OF INTERVENTIONS TO IMPROVE WALKING POST-STROKE**

Tilson JK, Wu SS, Cen SY, Feng Q, Rose DR, Behrman AL, Azen S, Duncan PW for the  
LEAPS Investigative Team

**SUPPLEMENTAL MATERIAL**  
**CHARACTERIZING AND IDENTIFYING RISK FOR FALLS IN THE LEAPS STUDY: A RANDOMIZED CLINICAL TRIAL OF INTERVENTIONS TO IMPROVE WALKING POST-STROKE.**

**Characteristics of Participants by Faller Category at 2 Months Post-stroke\***

| Item                                      | All Participants<br>(n=408) | Non-fallers<br>(n=173) | Single, Non-injurious fallers (n=88) | Multiple or injurious fallers (n=147) | p-value     |
|-------------------------------------------|-----------------------------|------------------------|--------------------------------------|---------------------------------------|-------------|
| <b>PERSONAL FACTORS</b>                   |                             |                        |                                      |                                       |             |
| <b>Demographics</b>                       |                             |                        |                                      |                                       |             |
| Male                                      | 224 (54.9%)                 | 99 (57.2%)             | 47 (53.4%)                           | 78 (53.1%)                            | 0.72        |
| Female                                    | 184 (45.1%)                 | 74 (42.8%)             | 41 (46.6%)                           | 69 (46.9%)                            |             |
| Age at stroke onset                       | 62.0±12.7                   | 60.8±13.2              | 60.5±12.9                            | 64.4±11.9                             | <b>0.02</b> |
| <b>Race</b>                               |                             |                        |                                      |                                       |             |
| American Indian/Alaska Native             | 5 (1.2%)                    | 3 (1.7%)               | 1 (1.1%)                             | 1 (0.7%)                              | 0.61        |
| Asian                                     | 54 (13.2%)                  | 26 (15%)               | 10 (11.4%)                           | 18 (12.2%)                            |             |
| Black or African-American                 | 90 (22.1%)                  | 46 (26.6%)             | 20 (22.7%)                           | 24 (16.3%)                            |             |
| White                                     | 236 (57.8%)                 | 90 (52.0%)             | 51 (58.0%)                           | 95 (64.6%)                            |             |
| Native Hawaiian or Other Pacific Islander | 19 (4.7%)                   | 6 (3.5%)               | 5 (5.7%)                             | 8 (5.4%)                              |             |
| More than one                             | 3 (0.7%)                    | 1 (0.6%)               | 1 (1.1%)                             | 1 (0.7%)                              |             |
| Unknown or not reported                   | 1 (0.2%)                    | 1 (0.6%)               | 0 (0%)                               | 0 (0%)                                |             |
| <b>Ethnic Category</b>                    |                             |                        |                                      |                                       |             |
| Hispanic or Latino                        | 63 (15.4%)                  | 28 (16.2%)             | 13 (14.8%)                           | 22 (15%)                              | 0.94        |
| Not Hispanic or Latino                    | 345 (84.6%)                 | 145 (83.8%)            | 75 (85.2%)                           | 125 (85.0%)                           |             |
| <b>Education</b>                          |                             |                        |                                      |                                       |             |
| <High School                              | 92 (22.5%)                  | 44 (25.4%)             | 17 (19.3%)                           | 31 (21.1%)                            | 0.10        |
| High School, GED                          | 112 (27.5%)                 | 56 (32.4%)             | 23 (26.1%)                           | 33 (22.4%)                            |             |
| Any college                               | 204 (50.0%)                 | 73 (42.2%)             | 48 (54.5%)                           | 83 (56.5%)                            |             |
| <b>Marital Status</b>                     |                             |                        |                                      |                                       |             |
| Single                                    | 54 (13.2%)                  | 19 (11.0%)             | 14 (15.9%)                           | 21 (14.3%)                            | 0.19        |
| Married                                   | 233 (57.1%)                 | 104 (60.1%)            | 48 (54.5%)                           | 81 (55.1%)                            |             |
| Separated                                 | 13 (3.2%)                   | 1 (0.6%)               | 6 (6.8%)                             | 6 (4.1%)                              |             |
| Divorced                                  | 42 (10.3%)                  | 22 (12.7%)             | 6 (6.8%)                             | 14 (9.5%)                             |             |
| Widowed                                   | 62 (15.2%)                  | 26 (15%)               | 12 (13.6%)                           | 24 (16.3%)                            |             |
| Other                                     | 4 (1.0%)                    | 1 (0.6%)               | 2 (2.3%)                             | 1 (0.7%)                              |             |
| <b>Insurance Coverage</b>                 |                             |                        |                                      |                                       |             |
| Medicare                                  | 111 (27.5%)                 | 46 (26.7%)             | 26 (29.9%)                           | 39 (26.9%)                            | 0.96        |
| Private                                   | 211 (52.2%)                 | 89 (51.7%)             | 47 (54.0%)                           | 75 (51.7%)                            |             |
| Medicaid                                  | 17 (4.2%)                   | 7 (4.1%)               | 3 (3.4%)                             | 7 (4.8%)                              |             |
| Uninsured                                 | 64 (15.8%)                  | 29 (16.9%)             | 11 (12.6%)                           | 24 (16.6%)                            |             |
| Other                                     | 1 (0.2%)                    | 1 (0.6%)               | 0 (0%)                               | 0 (0%)                                |             |
| <b>Co-morbidities</b>                     |                             |                        |                                      |                                       |             |
| Depression score (PHQ-9)                  | 4.7±5.2                     | 4.4±5.2                | 4.8±5.5                              | 5.0±5.1                               | 0.55        |
| Depression (PHQ-9 ≥10)                    | 67 (16.4%)                  | 28 (16.2%)             | 13 (14.8%)                           | 26 (17.7%)                            | 0.84        |
| Atrial fibrillation                       | 31 (7.6%)                   | 14 (8.1%)              | 7 (8.0%)                             | 10 (6.8%)                             | 0.90        |
| Coronary Artery Disease                   | 56 (13.8%)                  | 20 (11.6%)             | 13 (14.8%)                           | 23 (15.8%)                            | 0.53        |

**SUPPLEMENTAL MATERIAL**

**CHARACTERIZING AND IDENTIFYING RISK FOR FALLS IN THE LEAPS STUDY: A RANDOMIZED CLINICAL TRIAL OF INTERVENTIONS TO IMPROVE WALKING POST-STROKE.**

| <b>Item</b>                        | <b>All Participants (n=408)</b> | <b>Non-fallers (n=173)</b> | <b>Single, Non-injurious fallers (n=88)</b> | <b>Multiple or injurious fallers (n=147)</b> | <b>p-value</b> |
|------------------------------------|---------------------------------|----------------------------|---------------------------------------------|----------------------------------------------|----------------|
| On Beta-blocker                    | 163 (40.0%)                     | 69 (39.9%)                 | 39 (44.3%)                                  | 55 (37.4%)                                   | 0.58           |
| Diabetes Mellitus                  | 140 (34.4%)                     | 57 (33.1%)                 | 30 (34.1%)                                  | 53 (36.1%)                                   | 0.86           |
| History of alcohol abuse           | 15 (3.7%)                       | 5 (2.9%)                   | 0 (0%)                                      | 10 (6.8%)                                    | <b>0.02</b>    |
| Body Mass Index                    |                                 |                            |                                             |                                              |                |
| <18.5                              | 14 (3.4%)                       | 4 (2.3%)                   | 0 (0%)                                      | 10 (6.8%)                                    | 0.12           |
| 18.5-24.9                          | 146 (35.8%)                     | 64 (37%)                   | 30 (34.1%)                                  | 52 (35.4%)                                   |                |
| 25 - 29.9                          | 135 (33.1%)                     | 54 (31.2%)                 | 32 (36.4%)                                  | 49 (33.3%)                                   |                |
| >30                                | 113 (27.7%)                     | 51 (29.5%)                 | 26 (29.5%)                                  | 36 (24.5%)                                   |                |
| Pre-Morbid Barthel Index           | 99.3±2.4<br>(N=407)             | 99.5±2.0<br>(N=173)        | 99.5±2.2<br>(N=88)                          | 99.0±2.9<br>(N=146)                          | 0.11           |
| Pre-Morbid SF-36 PF                | 52.3±7.8<br>(N=404)             | 52.4±8.0<br>(N=171)        | 52.4±8.2<br>(N=88)                          | 52.2±7.2<br>(N=145)                          | 0.97           |
| Alcoholic drinks per week          | 2.4±5.8<br>(N=398)              | 2.4±5.3<br>(N=169)         | 1.8±3.6<br>(N=86)                           | 2.8±7.2<br>(N=143)                           | 0.46           |
| Smoker (yes)                       | 77 (19.1%)                      | 36 (20.8%)                 | 16 (18.6%)                                  | 25 (17.4%)                                   | 0.73           |
| Activity Level pre-stroke          |                                 |                            |                                             |                                              |                |
| 3 or more times a week             | 299 (73.5%)                     | 120 (69.8%)                | 68 (77.3%)                                  | 111 (75.5%)                                  | 0.79           |
| One or two times a week            | 60 (14.7%)                      | 29 (16.9%)                 | 13 (14.8%)                                  | 18 (12.2%)                                   |                |
| One to two times a month           | 23 (5.7%)                       | 11 (6.4%)                  | 3 (3.4%)                                    | 9 (6.1%)                                     |                |
| Less than once a month             | 13 (3.2%)                       | 5 (2.9%)                   | 2 (2.3%)                                    | 6 (4.1%)                                     |                |
| Never                              | 12 (2.9%)                       | 7 (4.1%)                   | 2 (2.3%)                                    | 3 (2%)                                       |                |
| <b>BODY FUNCTION AND STRUCTURE</b> |                                 |                            |                                             |                                              |                |
| <b>Stroke Characteristics</b>      |                                 |                            |                                             |                                              |                |
| Location                           |                                 |                            |                                             |                                              |                |
| Left                               | 164 (40.2%)                     | 71 (41%)                   | 31 (35.2%)                                  | 62 (42.2%)                                   | 0.53           |
| Right                              | 199 (48.8%)                     | 85 (49.1%)                 | 43 (48.9%)                                  | 71 (48.3%)                                   |                |
| Undefined                          | 45 (11.0%)                      | 17 (9.8%)                  | 14 (15.9%)                                  | 14 (9.5%)                                    |                |
| Stroke Type                        |                                 |                            |                                             |                                              |                |
| Ischemic                           | 290 (71.1%)                     | 121 (69.9%)                | 65 (73.9%)                                  | 104 (70.7%)                                  | 0.48           |
| Hemorrhagic                        | 70 (17.2%)                      | 34 (19.7%)                 | 10 (11.4%)                                  | 26 (17.7%)                                   |                |
| Uncertain                          | 48 (11.8%)                      | 18 (10.4%)                 | 13 (14.8%)                                  | 17 (11.6%)                                   |                |
| <b>Cognition</b>                   |                                 |                            |                                             |                                              |                |
| MMSE                               | 26.1±3.5<br>(N=368)             | 26.1±3.4<br>(N=151)        | 26.2±3.5<br>(N=82)                          | 26.0±3.6<br>(N=135)                          | 0.91           |
| Trail Making (B - A in seconds)    | 134.1±88.5<br>(N=375)           | 127.8±86.6<br>(N=157)      | 134.8±82.3<br>(N=83)                        | 141.1±94.1<br>(N=135)                        | 0.44           |
| WAIS Digit Symbol Subscale         | 31.02±17.0<br>(N=385)           | 32.3±17.8<br>(N=160)       | 31.1±14.8<br>(N=86)                         | 29.5±17.3<br>(N=139)                         | 0.37           |
| <b>Sensory-Motor</b>               |                                 |                            |                                             |                                              |                |
| FM Total Motor Score               | 58.3±25.3                       | 62.5±25.0                  | 55.0±25.4                                   | 55.4±25.0                                    | <b>0.02</b>    |
| FM LE Motor Score                  | 24.4±6.4                        | 25.3±6.23                  | 24.06±6.9                                   | 23.6±6.3                                     | <b>0.05</b>    |
| FM UE Motor Score                  | 34.0±20.7<br>(N=407)            | 37.4±20.7<br>(N=172)       | 31.0±20.9<br>(N=88)                         | 31.8±20.2<br>(N=147)                         | <b>0.02</b>    |
| FM Sensation Score                 | 19.5±5.9<br>(N=400)             | 20.1±5.4<br>(N=170)        | 19.1±6.0<br>(N=87)                          | 19.0±6.4<br>(N=143)                          | 0.19           |

**SUPPLEMENTAL MATERIAL**  
**CHARACTERIZING AND IDENTIFYING RISK FOR FALLS IN THE LEAPS STUDY: A RANDOMIZED CLINICAL TRIAL OF INTERVENTIONS TO IMPROVE WALKING POST-STROKE.**

| Item                                         | All Participants (n=408) | Non-fallers (n=173) | Single, Non-injurious fallers (n=88) | Multiple or injurious fallers (n=147) | p-value |
|----------------------------------------------|--------------------------|---------------------|--------------------------------------|---------------------------------------|---------|
| Paresis in dominant hand                     | N=171 (41.9%)            | N=77 (45.0%)        | N=33 (19.3%)                         | N=61 (35.7%)                          | 0.55    |
| <b>ACTIVITY LIMITATIONS</b>                  |                          |                     |                                      |                                       |         |
| Comfortable Walking Speed (m/s)              | 0.38±0.22                | 0.42±0.22           | 0.37±0.23                            | 0.34±0.21                             | <0.01   |
| Fast Walking Speed (m/s)                     | 0.51±0.31                | 0.57±0.3            | 0.5±0.33                             | 0.47±0.3                              | 0.01    |
| Fast - Comfortable Walking Speed (m/s)       | 0.14±0.12                | 0.15±0.13           | 0.13±0.11                            | 0.13±0.11                             | 0.16    |
| 6-minute walk distance (m)                   | 125±78                   | 141±77              | 118±82                               | 112±75                                | <0.01   |
| Berg Balance Score                           | 35.8±14.0                | 38.9±13.1           | 36.4±14.5                            | 31.7±13.8                             | <0.01   |
| Use of Assistive Device                      | 359 (88%)                | 144 (83.2%)         | 79 (89.8%)                           | 136 (92.5%)                           | 0.03    |
| Use of AFO                                   | 164 (40.2%)              | 64 (37.0%)          | 39 (44.3%)                           | 61 (41.5%)                            | 0.48    |
| ABC Scale                                    | 45.1±23.9 (N=406)        | 49.8±23.8 (N=172)   | 44.2±24.9 (N=87)                     | 40.0±22.5 (N=147)                     | <0.01   |
| <b>PARTICIPATION</b>                         |                          |                     |                                      |                                       |         |
| Steps/day                                    | 2552±2570 (N=384)        | 2893±2676 (N=163)   | 2308±2343 (N=81)                     | 2295±2540 (N=140)                     | 0.08    |
| Stroke Impact Scale (Participation Subscale) | 45.5±23.3                | 49.5±23.3           | 42.1±21.2                            | 42.8±23.8                             | 0.01    |
| Modified Rankin Scale                        |                          |                     |                                      |                                       |         |
| Rankin 0-2                                   | 56 (13.7%)               | 32 (18.5%)          | 11 (12.5%)                           | 13 (8.8%)                             | <0.01   |
| Rankin 3-4                                   | 352 (86.3%)              | 141 (81.5%)         | 77 (87.5%)                           | 134 (91.2%)                           |         |
| SF-36 Physical Function                      | 27.8±9.6 (N=406)         | 28.4±9.4 (N=171)    | 28.1±9.4 (N=88)                      | 26.8±9.9 (N=147)                      | 0.33    |

\*Categorical variables are N(%), continuous variables are mean ± standard deviation.

PHQ-9=Personal Health Questionnaire Depression Scale; MMSE=Mini Mental State Exam; WAIS=Wechsler Adult Intelligence Scale; FM=Fugl-Meyer; LE=Lower Extremity; UE=Upper Extremity; ABC=Activities Balance Confidence; SF-36 PF=Short-Form-36 Physical Function subsection.
